# Supplementary material for: Genetic Analyses of Amphotericin B Susceptibility in Aspergillus fumigatus
Source: MDPI journal article supplement (doi:10.3390/jof7100860), 2021-10-14
Supplement: s1 [file s1]

| Chromosome | Position (bp) | Reference Allele (0) | Alternative Allele (1) | AFB62-1 Genotype | CM11 Genotype |
|------------|---------------|----------------------|------------------------|------------------|---------------|
| 7          | 278,099       | A                    | G                      | 0                | 0             |
| 5          | 2,362,267     | G                    | A                      | 0                | 1             |
| 5          | 2,386,509     | T                    | G                      | 0                | 0             |
| 4          | 3,275,045     | T                    | A                      | 0                | 0             |
| 2          | 4,385,926     | G                    | A                      | 0                | 0             |
| 1          | 3,787,543     | A                    | G                      | 0                | 0             |
| 5          | 3,698,701     | G                    | T                      | 0                | 0             |
| 6          | 1,608,813     | C                    | T                      | 0                | 1             |
| 3          | 1,260,557     | T                    | C                      | 1                | 0             |
| 6          | 3,521,360     | G                    | A                      | 0                | 0             |
| 6          | 3,141,751     | G                    | A                      | 0                | 0             |
| 6          | 3,149,653     | G                    | T                      | 0                | 0             |
| 3          | 133,642       | T                    | C                      | 0                | 0             |
| 3          | 142,183       | A                    | C                      | 0                | 0             |
| 7          | 1,182,007     | A                    | C                      | 0                | 0             |
| 7          | 279,416       | T                    | C                      | 0                | 0             |
| 4          | 2,417,511     | A                    | G                      | 1                | 1             |
| 4          | 2,417,525     | G                    | T                      | 0                | 0             |
| 3          | 3,512,400     | T                    | C                      | 1                | 0             |
| 3          | 3,122,663     | A                    | C                      | 0                | 0             |
| 4          | 2,416,428     | A                    | G                      | 1                | 1             |
| 4          | 2,417,416     | A                    | C                      | 1                | 1             |
| 4          | 2,417,517     | T                    | C                      | 1                | 1             |
| 4          | 2,417,806     | C                    | T                      | 1                | 1             |
| 5          | 201,094       | T                    | C                      | 0                | 1             |
| 5          | 201,751       | G                    | A                      | 0                | 1             |
| 5          | 2,370,937     | C                    | G                      | 0                | 1             |
| 5          | 2,399,121     | G                    | A                      | 0                | 1             |
