# Supplementary material for: Genetic Analyses of Amphotericin B Susceptibility in Aspergillus fumigatus
Source: MDPI journal article supplement (doi:10.3390/jof7100860), 2021-10-14
Supplement: s1 [file s1]

| Strain name  | Run        | Accession  | Project Number | Country        | Source        | AMB MIC (mg/L)  | Reference DOI                |
|--------------|------------|------------|----------------|----------------|---------------|-----------------|------------------------------|
| Afs35        | DRR146814  | DRS075098  | PRJDB7240      | Germany        | Clinical      | 1               | 10.1371/journal.ppat.1006096 |
| B5233        | ERR2863830 | ERS2867139 | PRJEB28819     | United States  | Clinical      | 0.5             | 10.3201/eid1508.090251       |
| Af65         | ERR769499  | ERS663171  | PRJEB8623      | United Kingdom | Clinical      | 0.5             | 10.1128/mBio.00536-15        |
| 12-7505446   | ERR769500  | ERS663164  |                | United Kingdom | Clinical      | 0.25            |                              |
| 12-7505220   | ERR769501  | ERS663165  |                | United Kingdom | Clinical      | 0.5             |                              |
| 09-7500806   | ERR769502  | ERS663166  |                | United Kingdom | Clinical      | 0.5             |                              |
| 12-7504652   | ERR769503  | ERS663167  |                | United Kingdom | Clinical      | 0.25            |                              |
| 12-7504462   | ERR769504  | ERS663168  |                | United Kingdom | Clinical      | 0.5             |                              |
| 12-7505054   | ERR769505  | ERS663169  |                | United Kingdom | Clinical      | 0.5             |                              |
| 08-12-12-13  | ERR769506  | ERS663172  |                | Netherlands    | Clinical      | 0.25            |                              |
| 08-36-03-25  | ERR769507  | ERS663173  |                | Netherlands    | Clinical      | 0.5             |                              |
| 08-31-08-91  | ERR769508  | ERS663174  |                | Netherlands    | Clinical      | 0.5             |                              |
| 08-19-02-61  | ERR769509  | ERS663175  |                | Netherlands    | Environmental | 0.25            |                              |
| 08-19-02-30  | ERR769510  | ERS663176  |                | Netherlands    | Environmental | 0.5             |                              |
| 10-01-02-27  | ERR769511  | ERS663177  |                | Netherlands    | Clinical      | 0.5             |                              |
| 08-19-02-46  | ERR769512  | ERS663178  |                | Netherlands    | Environmental | 0.5             |                              |
| 08-19-02-10  | ERR769513  | ERS663179  |                | Netherlands    | Environmental | 0.25            |                              |
| Afu 942/09   | ERR769514  | ERS663180  |                | India          | Clinical      | 0.25            |                              |
| Afu 1042/09  | ERR769515  | ERS663181  |                | India          | Clinical      | 0.25            |                              |
| Afu 343/P/11 | ERR769516  | ERS663182  |                | India          | Clinical      | 0.125           |                              |
| Afu 591/12   | ERR769517  | ERS663183  |                | India          | Clinical      | 0.5             |                              |
| Afu 124/E11  | ERR769518  | ERS663184  |                | India          | Environmental | 0.125           |                              |
| Afu 257/E11  | ERR769520  | ERS663186  |                | India          | Environmental | 0.125           |                              |
| Afu 218/E11  | ERR769521  | ERS663187  |                | India          | Environmental | 0.125           |                              |
| CM3262       | SRR7418922 | SRS3453382 | PRJNA477519    | Spain          | Clinical      | 0.125 to 0.25 * | 10.1128/AAC.00241-18         |
| CM2733       | SRR7418923 | SRS3453380 |                | Spain          | Clinical      | 0.125 to 0.25 * |                              |
| CM2730       | SRR7418924 | SRS3453381 |                | Spain          | Clinical      | 0.125 to 0.25 * |                              |
| CM7560       | SRR7418925 | SRS3453379 |                | Spain          | Clinical      | 0.125 to 0.25 * |                              |
| CM3249       | SRR7418926 | SRS3453378 |                | Spain          | Clinical      | 0.125 to 0.25 * |                              |
| CM4602       | SRR7418928 | SRS3453376 |                | Spain          | Clinical      | 0.125 to 0.25 * |                              |
| CM2495       | SRR7418930 | SRS3453373 |                | Spain          | Clinical      | 0.125 to 0.25 * |                              |
| akuBKU80     | SRR7418932 | SRS3453372 |                | Spain          | Clinical      | 0.125 to 0.25 * |                              |
| CM7570       | SRR7418933 | SRS3453371 |                | Spain          | Clinical      | 0.125 to 0.25 * |                              |
| TP12         | SRR7418940 | SRS3453364 |                | Spain          | Clinical      | 0.125 to 0.25 * |                              |
| CM7632       | SRR7418941 | SRS3453363 |                | Spain          | Clinical      | 0.125 to 0.25 * |                              |
| TP32         | SRR7418946 | SRS3453358 |                | Spain          | Clinical      | 0.125 to 0.25 * |                              |

|                  |             |            |             |                |               |                 |                               |
|------------------|-------------|------------|-------------|----------------|---------------|-----------------|-------------------------------|
| CM4946           | SRR7418948  | SRS3453357 |             | Spain          | Clinical      | 0.125 to 0.25 * |                               |
| IFM 59355-1      | DRR022916   | DRS016460  | PRJDB3064   | Japan          | Clinical      | 2               | 10.1128/JCM.01105-14          |
| IFM 59355-2      | DRR022917   | DRS016461  |             | Japan          | Clinical      | 2               |                               |
| IFM 59356-1      | DRR022919   | DRS016462  |             | Japan          | Clinical      | 2               |                               |
| IFM 59356-2      | DRR022922   | DRS016463  |             | Japan          | Clinical      | 1               |                               |
| IFM 59356-3      | DRR022924   | DRS016464  |             | Japan          | Clinical      | 2               |                               |
| IFM 59361-1      | DRR022925   | DRS016465  |             | Japan          | Clinical      | 1               |                               |
| IFM 59361-2      | DRR022926   | DRS016466  |             | Japan          | Clinical      | 1               |                               |
| IFM 60237        | DRR022927   | DRS016467  |             | Japan          | Clinical      | 2               |                               |
| IFM 55369        | DRR015087   | DRS013318  | PRJDB1541   | Japan          | Clinical      | 1               | 10.1016/j.jiac.2015.01.005    |
| IFM 59056        | DRR015093   | DRS013319  |             | Japan          | Clinical      | 2               |                               |
| IFM 59359        | DRR015096   | DRS013320  |             | Japan          | Clinical      | 2               |                               |
| IFM 59361        | DRR015099   | DRS013321  |             | Japan          | Clinical      | 2               |                               |
| IFM 59073        | DRR015106   | DRS013323  |             | Japan          | Clinical      | 2               |                               |
| IFM 58029        | DRR017540   | DRS015320  |             | Japan          | Clinical      | 0.5             |                               |
| IFM 58401        | DRR017543   | DRS015321  |             | Japan          | Clinical      | 1               |                               |
| IFM 59777        | DRR017549   | DRS015323  |             | Japan          | Clinical      | 0.5             |                               |
| CNM-CM8689       | SRR10592629 | SRS5766627 | PRJNA592352 | Spain          | Clinical      | 1               | 10.3389/fgene.2020.00459      |
| CNM-CM8686       | SRR10592630 | SRS5766626 |             | Spain          | Clinical      | 0.5             |                               |
| CNM-CM8812       | SRR10592631 | SRS5766625 |             | Spain          | Clinical      | 0.25            |                               |
| CNM-CM8714       | SRR10592632 | SRS5766624 |             | Spain          | Clinical      | 0.25            |                               |
| CNM-CM8057       | SRR10592633 | SRS5766623 |             | Spain          | Clinical      | 0.25            |                               |
| DI 15-105        | SRR7841980  | SRS3786101 | PRJNA491253 | United States  | Clinical      | 0.125           | 10.1128/mBio.00437-19         |
| F11628           | SRR343149   | SRS260927  | PRJNA67101  | United Kingdom | Clinical      | 0.06            |                               |
| F12865           | SRR343150   | SRS260928  |             | United Kingdom | Clinical      | 0.125           |                               |
| F12041           | SRR617723   | SRS375794  |             | United Kingdom | Clinical      | 0.25            |                               |
| F13535           | SRR617726   | SRS375797  |             | United Kingdom | Clinical      | 0.125           |                               |
| AF72 (NCPF 7099) | SRR617721   | SRS375792  | PRJNA67101  | United States  | Clinical      | 0.25 (by M38-A) | 10.1093/jac/dkg384            |
| AF90 (NCPF 7100) | SRR617722   | SRS375793  |             | United States  | Clinical      | 0.5 (by M38-A)  |                               |
| V130-15          | SRR8759700  | SRS4515816 | PRJNA528395 | Netherlands    | Clinical      | 0.5             | 10.1016/j.fgb.2019.05.005     |
| V157-62          | SRR8759706  | SRS4515810 |             | Netherlands    | Clinical      | 0.25            |                               |
| CON4             | SRR12894204 | SRS7582162 | PRJNA671765 | Canada         | Environmental | 1               | 10.3390/microorganisms8111673 |
| CM21             | SRR12894203 | SRS7582164 |             | Canada         | Environmental | 2               |                               |
| CM65             | SRR12894200 | SRS7582166 |             | Canada         | Environmental | 4               |                               |
| P80              | SRR12894199 | SRS7582167 |             | Canada         | Environmental | 4               |                               |
| 15-1             | SRR12894198 | SRS7582170 |             | Canada         | Clinical      | 4               |                               |
| AV88             | SRR12894197 | SRS7582168 |             | Canada         | Environmental | 4               |                               |
| 15-33            | SRR12894196 | SRS7582169 |             | Canada         | Clinical      | 4               |                               |
| P20              | SRR12894195 | SRS7582171 |             | Canada         | Environmental | 4               |                               |

|           |             |            |             |               |               |          |                            |
|-----------|-------------|------------|-------------|---------------|---------------|----------|----------------------------|
| CM38      | SRR12894194 | SRS7582173 |             | Canada        | Environmental | 4        |                            |
| CM11      | SRR12894193 | SRS7582172 |             | Canada        | Environmental | 8        |                            |
| AFB62-1   | SRR12894202 | SRS7582163 |             | United States | Clinical      | 4        |                            |
| AFIR928   | SRR12894201 | SRS7582165 |             | Ireland       | Environmental | 4        |                            |
| IFM 46074 | SRR11977812 | SRS6816741 | PRJNA638646 | Japan         | Clinical      | 0.5      | 10.1016/j.jiac.2015.01.005 |
| IFM 48051 | SRR11977855 | SRS6816698 |             | Japan         | Clinical      | 1        |                            |
| IFM 49896 | SRR11977853 | SRS6816700 |             | Japan         | Clinical      | 1        |                            |
| IFM 50230 | SRR11977852 | SRS6816701 |             | Japan         | Clinical      | 1        |                            |
| IFM 50916 | SRR11977849 | SRS6816704 |             | Japan         | Clinical      | 1        |                            |
| IFM 50997 | SRR11977847 | SRS6816706 |             | Japan         | Clinical      | 1        |                            |
| IFM 50999 | SRR11977846 | SRS6816707 |             | Japan         | Clinical      | 2        |                            |
| IFM 51357 | SRR11977844 | SRS6816709 |             | Japan         | Clinical      | 2        |                            |
| IFM 51505 | SRR11977842 | SRS6816711 |             | Japan         | Clinical      | 0.5      |                            |
| IFM 51746 | SRR11977841 | SRS6816712 |             | Japan         | Clinical      | 2        |                            |
| IFM 51977 | SRR11977839 | SRS6816714 |             | Japan         | Clinical      | 1        |                            |
| IFM 51978 | SRR11977838 | SRS6816715 |             | Japan         | Clinical      | 0.5      |                            |
| IFM 55369 | SRR11977835 | SRS6816718 |             | Japan         | Clinical      | 1        |                            |
| IFM 59073 | SRR11977828 | SRS6816725 |             | Japan         | Clinical      | 2        |                            |
| IFM 59359 | SRR11977826 | SRS6816727 |             | Japan         | Clinical      | 2        |                            |
| CAPA-A    | SRR12949929 | SRS7620879 | PRJNA673120 | Germany       | Clinical      | 2 to 4 * | 10.1128/Spectrum.00010-21  |
| CAPA-B    | SRR12949928 | SRS7620880 |             | Germany       | Clinical      | 2        |                            |
| CAPA-C    | SRR12949927 | SRS7620882 |             | Germany       | Clinical      | 2        |                            |
| CAPA-D    | SRR12949926 | SRS7620881 |             | Germany       | Clinical      | 2        |                            |

\* The lower numeric value of a reported MIC range was used in the GWAS
