# Supplementary material for: Genetic Analyses of Amphotericin B Susceptibility in Aspergillus fumigatus
Source: MDPI journal article supplement (doi:10.3390/jof7100860), 2021-10-14
Supplement: s1 [file s1]

| Strain ID | AMB MIC (mg/L) | Mean Ratio of Fungal Growth in varying AMB Concentrations |           |           |           |           | Genotype at five SNP sites (AFB62-1 = 1, CM11 = 2) |       |       |       |       |
|-----------|----------------|-----------------------------------------------------------|-----------|-----------|-----------|-----------|----------------------------------------------------|-------|-------|-------|-------|
|           |                | 0.25 mg/L                                                 | 0.50 mg/L | 1.00 mg/L | 2.00 mg/L | 4.00 mg/L | SNP 1                                              | SNP 2 | SNP 3 | SNP 4 | SNP 5 |
| AFB62-1   | 4              | 0.651                                                     | 0.529     | 0.444     | 0.296     | NA        | 1                                                  | 1     | 1     | 1     | 1     |
| CM11      | 8              | 0.773                                                     | 0.672     | 0.418     | 0.338     | 0.006     | 2                                                  | 2     | 2     | 2     | 2     |
| 1         | 4              | 0.752                                                     | 0.605     | 0.494     | 0.007     | NA        | 1                                                  | 2     | 2     | 2     | 2     |
| 2         | 4              | 0.975                                                     | 1.296     | 0.585     | 0.216     | NA        | 1                                                  | 1     | 1     | 1     | 1     |
| 3         | 4              | 0.799                                                     | 0.681     | 0.668     | 0.187     | NA        | 2                                                  | 1     | 1     | 1     | 1     |
| 4         | 4              | 0.597                                                     | 0.575     | 0.549     | 0.300     | NA        | 2                                                  | 2     | 2     | 2     | 1     |
| 5         | 4              | 0.591                                                     | 0.439     | 0.383     | 0.127     | NA        | 2                                                  | 2     | 1     | 1     | 2     |
| 6         | 4              | 0.612                                                     | 0.646     | 0.613     | 0.086     | NA        | 1                                                  | 1     | 1     | 1     | 1     |
| 7         | 8              | 0.938                                                     | 0.772     | 0.578     | 0.523     | 0.193     | 2                                                  | 2     | 1     | 1     | 2     |
| 8         | 4              | 0.893                                                     | 0.770     | 0.714     | 0.559     | NA        | 2                                                  | 1     | 1     | 1     | 1     |
| 9         | 4              | 0.956                                                     | 0.791     | 0.825     | 0.588     | NA        | 1                                                  | 1     | 1     | 1     | 2     |
| 10        | 4              | 0.777                                                     | 0.705     | 0.575     | 0.212     | NA        | 1                                                  | 2     | 2     | 2     | 2     |
| 11        | 4              | 0.836                                                     | 0.714     | 0.637     | 0.192     | NA        | 1                                                  | 1     | 1     | 1     | 1     |
| 12        | 4              | 0.835                                                     | 0.586     | 0.584     | 0.106     | NA        | 2                                                  | 2     | 2     | 2     | 1     |
| 13        | 4              | 0.781                                                     | 0.501     | 0.389     | 0.485     | NA        | 1                                                  | 1     | 1     | 1     | 2     |
| 14        | 4              | 1.059                                                     | 0.943     | 0.878     | 0.507     | NA        | 1                                                  | 1     | 1     | 1     | 1     |
| 15        | 2              | 0.712                                                     | 0.606     | 0.369     | NA        | NA        | 2                                                  | 1     | 1     | 1     | 1     |
| 16        | 4              | 0.719                                                     | 0.617     | 0.561     | 0.119     | NA        | 2                                                  | 2     | 2     | 2     | 2     |
| 17        | 8              | 1.140                                                     | 1.049     | 1.206     | 0.684     | 0.020     | 2                                                  | 2     | 2     | 2     | 1     |
| 18        | 4              | 0.859                                                     | 0.531     | 0.422     | 0.188     | NA        | 2                                                  | 1     | 1     | 1     | 2     |
| 19        | 4              | 0.916                                                     | 0.807     | 0.780     | 0.432     | NA        | 1                                                  | 1     | 1     | 1     | 1     |
| 20        | 4              | 0.779                                                     | 0.800     | 0.827     | 0.583     | NA        | 1                                                  | 2     | 2     | 2     | 2     |
| 21        | 4              | 0.874                                                     | 0.742     | 0.821     | 0.699     | NA        | 2                                                  | 1     | 1     | 1     | 2     |
| 22        | 4              | 0.821                                                     | 0.602     | 0.559     | 0.362     | NA        | 2                                                  | 2     | 2     | 2     | 1     |
| 23        | 4              | 0.849                                                     | 0.500     | 0.441     | 0.286     | NA        | 2                                                  | 1     | 1     | 1     | 2     |
| 24        | 4              | 1.327                                                     | 0.836     | 1.024     | 0.295     | NA        | 2                                                  | 1     | 1     | 1     | 1     |
| 25        | 4              | 0.847                                                     | 0.912     | 1.126     | 0.148     | NA        | 1                                                  | 2     | 2     | 2     | 2     |
| 26        | 4              | 0.782                                                     | 0.811     | 1.227     | 0.085     | NA        | 2                                                  | 1     | 1     | 1     | 2     |
| 27        | 4              | 0.828                                                     | 0.598     | 0.905     | 0.011     | NA        | 1                                                  | 1     | 1     | 1     | 1     |
| 28        | 4              | 1.381                                                     | 1.113     | 0.956     | 0.689     | NA        | 2                                                  | 2     | 2     | 1     | 2     |
| 29        | 4              | 0.780                                                     | 0.712     | 1.004     | 0.166     | NA        | 1                                                  | 1     | 1     | 1     | 2     |
| 30        | 2              | 0.783                                                     | 0.706     | 0.504     | NA        | NA        | 2                                                  | 2     | 2     | 2     | 2     |
| 31        | 2              | 0.626                                                     | 0.426     | 0.304     | NA        | NA        | 2                                                  | 2     | 2     | 2     | 1     |
| 32        | 4              | 0.898                                                     | 0.766     | 1.068     | 0.414     | NA        | 1                                                  | 1     | 1     | 1     | 2     |
| 33        | 4              | 0.616                                                     | 0.386     | 0.378     | 0.193     | NA        | 2                                                  | 1     | 1     | 1     | 1     |
| 34        | 4              | 0.547                                                     | 0.310     | 0.205     | 0.053     | NA        | 2                                                  | 2     | 2     | 2     | 2     |
| 35        | 4              | 0.755                                                     | 0.666     | 0.483     | 0.124     | NA        | 2                                                  | 2     | 2     | 2     | 2     |
| 36        | 4              | 0.660                                                     | 0.730     | 0.832     | 0.530     | NA        | 2                                                  | 1     | 1     | 1     | 2     |
| 37        | 4              | 0.977                                                     | 0.826     | 0.740     | 0.557     | NA        | 1                                                  | 2     | 2     | 2     | 1     |
| 38        | 4              | 0.795                                                     | 0.400     | 0.383     | 0.250     | NA        | 2                                                  | 2     | 2     | 2     | 2     |
| 39        | 4              | 0.833                                                     | 0.810     | 0.577     | 0.087     | NA        | 2                                                  | 2     | 2     | 2     | 2     |

|    |   |       |       |       |       |       |   |   |   |   |   |
|----|---|-------|-------|-------|-------|-------|---|---|---|---|---|
| 40 | 4 | 1.006 | 0.731 | 0.637 | 0.427 | NA    | 1 | 2 | 2 | 2 | 1 |
| 41 | 4 | 0.868 | 0.797 | 0.676 | 0.252 | NA    | 1 | 1 | 1 | 1 | 2 |
| 42 | 4 | 0.788 | 0.612 | 0.484 | 0.357 | NA    | 2 | 1 | 1 | 1 | 1 |
| 43 | 4 | 0.750 | 0.663 | 0.577 | 0.319 | NA    | 1 | 1 | 1 | 1 | 1 |
| 44 | 8 | 0.896 | 0.810 | 0.809 | 0.733 | 0.008 | 2 | 2 | 2 | 2 | 2 |
| 45 | 4 | 0.678 | 0.417 | 0.277 | 0.179 | NA    | 2 | 2 | 2 | 2 | 1 |
| 46 | 4 | 0.712 | 0.636 | 0.505 | 0.286 | NA    | 2 | 2 | 2 | 2 | 1 |
| 47 | 4 | 0.838 | 0.778 | 0.625 | 0.292 | NA    | 2 | 2 | 2 | 2 | 1 |
| 48 | 4 | 0.718 | 0.537 | 0.423 | 0.415 | NA    | 1 | 2 | 2 | 2 | 2 |
| 49 | 4 | 0.652 | 0.394 | 0.278 | 0.170 | NA    | 1 | 2 | 2 | 2 | 2 |
| 50 | 4 | 0.698 | 0.461 | 0.401 | 0.077 | NA    | 1 | 2 | 2 | 1 | 1 |
| 51 | 8 | 0.864 | 0.842 | 0.783 | 0.645 | 0.247 | 2 | 1 | 1 | 1 | 1 |
| 52 | 8 | 0.682 | 0.715 | 0.586 | 0.616 | 0.088 | 2 | 1 | 1 | 1 | 1 |
| 53 | 8 | 0.445 | 0.484 | 0.398 | 0.459 | 0.040 | 1 | 2 | 2 | 2 | 2 |
| 54 | 4 | 0.741 | 0.487 | 0.484 | 0.238 | NA    | 2 | 2 | 2 | 2 | 1 |
| 55 | 8 | 0.831 | 0.837 | 0.753 | 0.566 | 0.005 | 1 | 2 | 2 | 2 | 2 |
| 56 | 4 | 0.736 | 0.744 | 0.746 | 0.359 | NA    | 1 | 1 | 1 | 1 | 2 |
| 57 | 4 | 0.910 | 0.758 | 0.444 | 0.276 | NA    | 2 | 1 | 1 | 1 | 2 |
| 58 | 4 | 1.077 | 0.719 | 0.767 | 0.128 | NA    | 2 | 2 | 2 | 2 | 1 |
| 59 | 4 | 0.851 | 0.592 | 0.573 | 0.495 | NA    | 2 | 1 | 1 | 1 | 2 |
| 60 | 4 | 1.046 | 0.866 | 0.470 | 0.229 | NA    | 1 | 1 | 1 | 1 | 1 |
| 61 | 8 | 0.923 | 0.903 | 0.855 | 0.733 | 0.074 | 2 | 2 | 2 | 1 | 1 |
| 62 | 4 | 0.692 | 0.703 | 0.682 | 0.469 | NA    | 1 | 2 | 2 | 2 | 2 |
| 63 | 4 | 0.906 | 0.488 | 0.598 | 0.476 | NA    | 1 | 2 | 2 | 2 | 1 |
| 64 | 4 | 0.739 | 0.594 | 0.460 | 0.287 | NA    | 2 | 1 | 1 | 1 | 1 |
| 65 | 8 | 1.566 | 1.091 | 0.722 | 0.672 | 0.099 | 2 | 1 | 1 | 1 | 2 |
| 66 | 4 | 1.558 | 1.540 | 1.218 | 0.528 | NA    | 2 | 1 | 1 | 1 | 2 |
| 67 | 4 | 0.844 | 0.861 | 0.837 | 0.653 | NA    | 2 | 1 | 1 | 1 | 2 |
| 68 | 4 | 0.789 | 0.746 | 0.748 | 0.481 | NA    | 2 | 2 | 2 | 1 | 2 |
| 69 | 4 | 0.955 | 1.408 | 0.633 | 0.077 | NA    | 2 | 2 | 2 | 2 | 1 |
| 70 | 8 | 0.618 | 0.690 | 0.682 | 0.419 | 0.004 | 2 | 2 | 2 | 2 | 2 |
| 71 | 4 | 0.888 | 0.899 | 0.907 | 0.578 | NA    | 1 | 2 | 2 | 2 | 2 |
| 72 | 4 | 1.759 | 0.762 | 0.822 | 0.240 | NA    | 2 | 2 | 2 | 2 | 2 |
| 73 | 4 | 1.171 | 1.245 | 0.758 | 0.072 | NA    | 1 | 1 | 1 | 1 | 2 |
| 74 | 4 | 0.655 | 0.735 | 0.724 | 0.283 | NA    | 1 | 2 | 2 | 2 | 2 |
| 75 | 4 | 0.749 | 0.794 | 0.707 | 0.572 | NA    | 1 | 1 | 1 | 1 | 2 |
| 76 | 4 | 0.928 | 0.832 | 0.814 | 0.549 | NA    | 2 | 2 | 2 | 2 | 2 |
| 77 | 4 | 0.612 | 0.698 | 0.567 | 0.017 | NA    | 2 | 1 | 1 | 1 | 2 |
| 78 | 8 | 0.594 | 0.645 | 0.740 | 0.307 | 0.017 | 1 | 1 | 1 | 1 | 1 |
| 79 | 4 | 0.771 | 0.802 | 0.474 | 0.131 | NA    | 1 | 2 | 2 | 2 | 2 |
| 80 | 2 | 0.638 | 0.570 | 0.387 | NA    | NA    | 2 | 2 | 2 | 2 | 1 |
| 81 | 4 | 0.690 | 0.585 | 0.486 | 0.455 | NA    | 1 | 1 | 1 | 1 | 2 |
| 82 | 4 | 0.877 | 1.020 | 0.691 | 0.389 | NA    | 2 | 2 | 2 | 2 | 2 |

|     |   |       |       |       |       |       |   |   |   |   |   |
|-----|---|-------|-------|-------|-------|-------|---|---|---|---|---|
| 83  | 4 | 1.179 | 0.653 | 0.804 | 0.384 | NA    | 1 | 2 | 2 | 2 | 2 |
| 84  | 4 | 0.765 | 0.517 | 0.549 | 0.317 | NA    | 1 | 1 | 1 | 1 | 1 |
| 85  | 4 | 0.753 | 0.675 | 0.613 | 0.198 | NA    | 2 | 2 | 2 | 2 | 2 |
| 86  | 4 | 0.672 | 0.549 | 0.416 | 0.156 | NA    | 2 | 2 | 2 | 1 | 1 |
| 87  | 4 | 0.737 | 0.668 | 0.848 | 0.330 | NA    | 1 | 1 | 1 | 1 | 1 |
| 88  | 4 | 0.833 | 0.796 | 0.482 | 0.291 | NA    | 1 | 1 | 1 | 1 | 1 |
| 89  | 4 | 0.819 | 0.618 | 0.508 | 0.375 | NA    | 2 | 2 | 2 | 2 | 2 |
| 90  | 4 | 0.697 | 0.736 | 0.762 | 0.305 | NA    | 1 | 2 | 2 | 2 | 1 |
| 91  | 4 | 0.816 | 0.708 | 0.575 | 0.252 | NA    | 1 | 2 | 2 | 2 | 2 |
| 92  | 4 | 0.563 | 0.526 | 0.442 | 0.171 | NA    | 1 | 2 | 2 | 2 | 2 |
| 93  | 8 | 0.847 | 0.742 | 0.714 | 0.378 | 0.241 | 1 | 2 | 2 | 2 | 2 |
| 94  | 8 | 0.822 | 0.779 | 0.446 | 0.492 | 0.081 | 1 | 1 | 1 | 1 | 1 |
| 95  | 8 | 0.695 | 0.486 | 0.503 | 0.265 | 0.066 | 1 | 1 | 1 | 1 | 2 |
| 96  | 4 | 0.862 | 0.774 | 0.645 | 0.250 | NA    | 2 | 1 | 1 | 1 | 2 |
| 97  | 4 | 0.808 | 0.659 | 0.637 | 0.166 | NA    | 1 | 2 | 2 | 2 | 1 |
| 98  | 4 | 0.896 | 0.827 | 0.596 | 0.496 | NA    | 2 | 1 | 1 | 1 | 2 |
| 99  | 4 | 0.695 | 0.863 | 0.704 | 0.125 | NA    | 1 | 2 | 2 | 2 | 1 |
| 100 | 4 | 0.718 | 0.683 | 0.700 | 0.494 | NA    | 1 | 2 | 2 | 2 | 1 |
| 101 | 4 | 0.790 | 0.637 | 0.588 | 0.231 | NA    | 2 | 1 | 1 | 1 | 1 |
| 102 | 4 | 0.774 | 0.974 | 0.803 | 0.562 | NA    | 1 | 2 | 2 | 2 | 1 |
| 103 | 4 | 0.854 | 0.764 | 0.572 | 0.453 | NA    | 2 | 2 | 2 | 1 | 1 |
| 104 | 4 | 0.739 | 0.769 | 0.489 | 0.409 | NA    | 1 | 1 | 1 | 1 | 1 |
| 105 | 4 | 0.965 | 0.773 | 0.704 | 0.406 | NA    | 2 | 2 | 2 | 2 | 1 |
| 106 | 4 | 0.849 | 0.684 | 0.870 | 0.453 | NA    | 2 | 2 | 2 | 2 | 2 |
| 107 | 4 | 0.603 | 0.491 | 0.388 | 0.268 | NA    | 1 | 1 | 1 | 2 | 1 |
| 108 | 4 | 0.903 | 0.480 | 0.556 | 0.659 | NA    | 2 | 2 | 2 | 2 | 2 |
| 109 | 4 | 0.732 | 0.670 | 0.641 | 0.653 | NA    | 1 | 2 | 2 | 2 | 1 |
| 110 | 4 | 0.783 | 0.748 | 0.719 | 0.926 | NA    | 2 | 2 | 2 | 2 | 2 |
| 111 | 4 | 0.787 | 0.745 | 0.518 | 0.405 | NA    | 1 | 2 | 1 | 1 | 1 |
| 112 | 4 | 0.822 | 0.694 | 0.716 | 0.392 | NA    | 1 | 2 | 2 | 2 | 2 |
| 113 | 4 | 0.699 | 0.407 | 0.444 | 0.251 | NA    | 1 | 1 | 1 | 1 | 1 |
| 114 | 4 | 0.703 | 0.660 | 0.532 | 0.329 | NA    | 2 | 2 | 2 | 2 | 2 |
| 115 | 4 | 0.875 | 0.536 | 0.390 | 0.257 | NA    | 1 | 2 | 2 | 2 | 2 |
| 116 | 4 | 1.157 | 0.928 | 0.790 | 0.607 | NA    | 1 | 1 | 1 | 2 | 2 |
| 117 | 4 | 0.822 | 0.618 | 0.519 | 0.391 | NA    | 1 | 1 | 1 | 1 | 2 |
| 118 | 4 | 0.669 | 0.483 | 0.418 | 0.217 | NA    | 1 | 1 | 1 | 1 | 1 |
| 119 | 4 | 0.742 | 0.911 | 0.536 | 0.288 | NA    | 1 | 2 | 2 | 2 | 2 |
| 120 | 4 | 0.865 | 1.054 | 0.863 | 0.588 | NA    | 1 | 1 | 1 | 1 | 2 |
| 121 | 4 | 0.857 | 1.831 | 0.900 | 0.883 | NA    | 2 | 1 | 1 | 1 | 2 |
| 122 | 4 | 0.679 | 0.590 | 0.325 | 0.333 | NA    | 2 | 1 | 1 | 1 | 1 |
| 123 | 4 | 1.350 | 0.915 | 0.768 | 0.282 | NA    | 1 | 1 | 1 | 1 | 2 |
| 124 | 4 | 0.684 | 0.524 | 0.507 | 0.287 | NA    | 2 | 2 | 2 | 2 | 1 |
| 125 | 4 | 1.015 | 0.866 | 0.748 | 0.498 | NA    | 2 | 1 | 1 | 1 | 2 |

|     |   |       |       |       |       |       |   |   |   |   |   |
|-----|---|-------|-------|-------|-------|-------|---|---|---|---|---|
| 126 | 4 | 1.662 | 0.815 | 0.677 | 0.198 | NA    | 2 | 1 | 2 | 2 | 2 |
| 127 | 4 | 1.442 | 0.887 | 0.450 | 0.266 | NA    | 1 | 1 | 1 | 1 | 2 |
| 128 | 8 | 0.879 | 0.763 | 0.680 | 0.345 | 0.116 | 2 | 2 | 2 | 2 | 1 |
| 129 | 8 | 0.789 | 0.566 | 0.422 | 0.467 | 0.351 | 1 | 2 | 2 | 2 | 2 |
| 130 | 4 | 0.625 | 0.638 | 0.599 | 0.522 | NA    | 2 | 1 | 1 | 1 | 1 |
| 131 | 4 | 0.668 | 0.697 | 0.507 | 0.442 | NA    | 1 | 2 | 2 | 2 | 2 |
| 132 | 8 | 0.756 | 0.889 | 1.224 | 0.827 | 0.124 | 2 | 2 | 2 | 2 | 1 |
| 133 | 4 | 0.849 | 0.701 | 0.506 | 0.414 | NA    | 2 | 1 | 1 | 1 | 1 |
| 134 | 4 | 0.562 | 0.610 | 0.445 | 0.445 | NA    | 1 | 1 | 1 | 1 | 1 |
| 135 | 4 | 0.694 | 0.541 | 0.557 | 0.391 | NA    | 1 | 1 | 1 | 1 | 2 |
| 136 | 4 | 0.688 | 0.646 | 0.587 | 0.400 | NA    | 1 | 2 | 2 | 2 | 1 |
| 137 | 8 | 0.643 | 0.513 | 0.491 | 0.521 | 0.007 | 2 | 2 | 2 | 2 | 2 |
| 138 | 8 | 0.700 | 0.522 | 0.414 | 0.286 | 0.006 | 2 | 1 | 1 | 1 | 2 |
| 139 | 4 | 0.661 | 0.517 | 0.439 | 0.439 | NA    | 1 | 1 | 1 | 1 | 2 |
| 140 | 4 | 0.680 | 0.435 | 0.389 | 0.395 | NA    | 1 | 2 | 2 | 2 | 2 |
| 141 | 4 | 0.667 | 0.513 | 0.469 | 0.403 | NA    | 1 | 1 | 1 | 1 | 1 |
| 142 | 4 | 0.889 | 0.611 | 0.596 | 0.631 | NA    | 1 | 2 | 2 | 2 | 2 |
| 143 | 4 | 0.853 | 0.716 | 0.456 | 0.386 | NA    | 2 | 1 | 1 | 1 | 1 |

NA = Not applicable
